# Supplementary material
Source: ML conference proceedings conference paper supplement (https://aclanthology.org/D17-1039)
Supplement: Attachment [file D17-1039.Attachment.zip]

|                                                                                                                                                                                                                                                                                                                                                                                                                                                                                                                                                                                                                                                                                                                                                                                                                                                                                                                                                                                                                                                                                                                                                                                                                                                                                                                                                                                                                                                                                                                                                                                                                                                                                    |
|------------------------------------------------------------------------------------------------------------------------------------------------------------------------------------------------------------------------------------------------------------------------------------------------------------------------------------------------------------------------------------------------------------------------------------------------------------------------------------------------------------------------------------------------------------------------------------------------------------------------------------------------------------------------------------------------------------------------------------------------------------------------------------------------------------------------------------------------------------------------------------------------------------------------------------------------------------------------------------------------------------------------------------------------------------------------------------------------------------------------------------------------------------------------------------------------------------------------------------------------------------------------------------------------------------------------------------------------------------------------------------------------------------------------------------------------------------------------------------------------------------------------------------------------------------------------------------------------------------------------------------------------------------------------------------|
| <b>Source Document</b>                                                                                                                                                                                                                                                                                                                                                                                                                                                                                                                                                                                                                                                                                                                                                                                                                                                                                                                                                                                                                                                                                                                                                                                                                                                                                                                                                                                                                                                                                                                                                                                                                                                             |
| ( cnn ) like phone booths and typewriters , record stores are a vanishing breed – another victim of the digital age . camelot music . virgin megastores . warehouse music . tower records . all of them gone . corporate america has largely abandoned brick - and - mortar music retailing to a scattering of independent stores , many of them in scruffy urban neighborhoods . and that s not necessarily a bad thing . yes , it s harder in the spotify era to find a place to go buy physical music . but many of the remaining record stores are succeeding – even thriving – by catering to a passionate core of customers and collectors . on saturday , hundreds of music retailers will hold events to commemorate record store day , an annual celebration of , well , your neighborhood record store . many stores will host live performances , drawings , book signings , special sales of rare or autographed vinyl and other happenings . some will even serve beer . to their diehard customers , these places are more than mere stores : they are cultural institutions that celebrate music history ( the entire duran duran oeuvre , all in one place ! ) , display artifacts ( aretha franklin on vinyl ! ) , and nurture the local music scene ( hey , here s a cd by your brother s metal band ! ) . they also employ knowledgeable clerks who will be happy to debate the relative merits of blood on the tracks and blonde on blonde . or maybe , like jack black in high fidelity , just mock your lousy taste in music . so if you re a music geek , drop by . but you might think twice before asking if they stock i just called to say i love you . |
| <b>Ground Truth summary</b>                                                                                                                                                                                                                                                                                                                                                                                                                                                                                                                                                                                                                                                                                                                                                                                                                                                                                                                                                                                                                                                                                                                                                                                                                                                                                                                                                                                                                                                                                                                                                                                                                                                        |
| saturday is record store day , celebrated at music stores around the world . many stores will host live performances , drawings and special sales of rare vinyl .                                                                                                                                                                                                                                                                                                                                                                                                                                                                                                                                                                                                                                                                                                                                                                                                                                                                                                                                                                                                                                                                                                                                                                                                                                                                                                                                                                                                                                                                                                                  |
| <b>No pretrain</b>                                                                                                                                                                                                                                                                                                                                                                                                                                                                                                                                                                                                                                                                                                                                                                                                                                                                                                                                                                                                                                                                                                                                                                                                                                                                                                                                                                                                                                                                                                                                                                                                                                                                 |
| corporate america has largely abandoned brick - brick - mortar music . many of the remaining record stores are succeeding – even thriving – by catering to a passionate core of customers .                                                                                                                                                                                                                                                                                                                                                                                                                                                                                                                                                                                                                                                                                                                                                                                                                                                                                                                                                                                                                                                                                                                                                                                                                                                                                                                                                                                                                                                                                        |
| <b>Pretrained</b>                                                                                                                                                                                                                                                                                                                                                                                                                                                                                                                                                                                                                                                                                                                                                                                                                                                                                                                                                                                                                                                                                                                                                                                                                                                                                                                                                                                                                                                                                                                                                                                                                                                                  |
| hundreds of music retailers will hold events to commemorate record store day . many stores will host live performances , drawings , book signings , special sales of rare or autographed vinyl .                                                                                                                                                                                                                                                                                                                                                                                                                                                                                                                                                                                                                                                                                                                                                                                                                                                                                                                                                                                                                                                                                                                                                                                                                                                                                                                                                                                                                                                                                   |

Table 5: The pretrained model outputs a highly informative summary, while the no pretrain model outputs irrelevant details.

|                                                                                                                                                                                                                                                                                                                                                                                                                                                                                                                                                                                                                                                                                                                                                                                                                                                                                                                                                                                                                                                                                                                                                                                                                                                                                                                                                                                                                                                                                                                                                                                                                                                                                                                                                                                                                                                                                                                                                                                                                                                                                                                                                                                                                                                                                                                                                                                                                                                                                                                                                                                                                                                                                                                                                                                                                                                                                                                                                                                                                                                                                                                                                                                        |
|----------------------------------------------------------------------------------------------------------------------------------------------------------------------------------------------------------------------------------------------------------------------------------------------------------------------------------------------------------------------------------------------------------------------------------------------------------------------------------------------------------------------------------------------------------------------------------------------------------------------------------------------------------------------------------------------------------------------------------------------------------------------------------------------------------------------------------------------------------------------------------------------------------------------------------------------------------------------------------------------------------------------------------------------------------------------------------------------------------------------------------------------------------------------------------------------------------------------------------------------------------------------------------------------------------------------------------------------------------------------------------------------------------------------------------------------------------------------------------------------------------------------------------------------------------------------------------------------------------------------------------------------------------------------------------------------------------------------------------------------------------------------------------------------------------------------------------------------------------------------------------------------------------------------------------------------------------------------------------------------------------------------------------------------------------------------------------------------------------------------------------------------------------------------------------------------------------------------------------------------------------------------------------------------------------------------------------------------------------------------------------------------------------------------------------------------------------------------------------------------------------------------------------------------------------------------------------------------------------------------------------------------------------------------------------------------------------------------------------------------------------------------------------------------------------------------------------------------------------------------------------------------------------------------------------------------------------------------------------------------------------------------------------------------------------------------------------------------------------------------------------------------------------------------------------------|
| <b>Source Document</b>                                                                                                                                                                                                                                                                                                                                                                                                                                                                                                                                                                                                                                                                                                                                                                                                                                                                                                                                                                                                                                                                                                                                                                                                                                                                                                                                                                                                                                                                                                                                                                                                                                                                                                                                                                                                                                                                                                                                                                                                                                                                                                                                                                                                                                                                                                                                                                                                                                                                                                                                                                                                                                                                                                                                                                                                                                                                                                                                                                                                                                                                                                                                                                 |
| <p>( cnn ) hey , look what i did . that small boast on social media can trigger a whirlwind that spins into real - life grief , as a texas veterinarian found out after shooting a cat . dr. kristen lindsey allegedly shot an arrow into the back of an orange tabby s head and posted a proud photo this week on facebook of herself smiling , as she dangled its limp body by the arrow s shaft . lindsey added a comment , cnn affiliate kbtx reported . my first bow kill , lol . the only good feral tomcat is one with an arrow through it s head ! vet of the year award ... gladly accepted . callers rang the phones hot at washington county s animal clinic , where lindsey worked , to vent their outrage . web traffic crashed its website . high price of public shaming on the internet then an animal rescuer said that lindsey s prey was probably not a feral cat but the pet of an elderly couple , who called him tiger . he had gone missing on wednesday , the same day that lindsey posted the photo of the slain cat . cnn has not been able to confirm the claim . as the firestorm grew , lindsey wrote in the comments underneath her post : no i did not lose my job . lol . psshh . like someone would get rid of me . i m awesome ! that prediction was wrong . the clinic fired lindsey , covered her name on its marquee with duct tape , and publicly distanced itself from her actions . our goal now is to go on and try to fix our black eye and hope that people are reasonable and understand that those actions do nt anyway portray what we re for here at washington animal clinic , said dr. bruce buenger . we put our heart and soul into this place . the clinic told wbtv that lindsey was not available for comment . cnn is reaching out to her . she removed her controversial post then eventually shut down her facebook page . callers also complained to the brenham police department and washington county animal control , as her facebook post went viral . the sheriff s office in austin county , where the cat was apparently shot , is investigating , and lindsey could face charges . its dispatchers were overloaded with calls , the sheriff posted on facebook . we are asking you to please take it easy on our dispatchers . as soon as the investigation is complete , we will post the relevant information here on this page , the post read . animal rights activists are pushing for charges . animal cruelty must be taken seriously , and the guilty parties should be punished to the fullest extent of the law , said cat advocacy activist becky robinson . her organization , alley cat allies , is offering a \$ 7,500 reward for evidence leading to the arrest and conviction of the person who shot the cat . but others stood up for lindsey . she s amazing . she s caring , said customer shannon stoddard . she s a good vet , so maybe her bad choice of posting something on facebook was not good . but i do nt think she should be judged for it . she dropped off balloons at the animal clinic for lindsey with a thank you note . cnn s jeremy grisham contributed to this report .</p> |
| <b>Ground Truth summary</b>                                                                                                                                                                                                                                                                                                                                                                                                                                                                                                                                                                                                                                                                                                                                                                                                                                                                                                                                                                                                                                                                                                                                                                                                                                                                                                                                                                                                                                                                                                                                                                                                                                                                                                                                                                                                                                                                                                                                                                                                                                                                                                                                                                                                                                                                                                                                                                                                                                                                                                                                                                                                                                                                                                                                                                                                                                                                                                                                                                                                                                                                                                                                                            |
| <p>dr. kristen lindsey has since removed the post of her holding the dead cat by an arrow . her employer fired her ; the sheriff s office is investigating . activist offers \$ 7,500 reward .</p>                                                                                                                                                                                                                                                                                                                                                                                                                                                                                                                                                                                                                                                                                                                                                                                                                                                                                                                                                                                                                                                                                                                                                                                                                                                                                                                                                                                                                                                                                                                                                                                                                                                                                                                                                                                                                                                                                                                                                                                                                                                                                                                                                                                                                                                                                                                                                                                                                                                                                                                                                                                                                                                                                                                                                                                                                                                                                                                                                                                     |
| <b>No pretrain</b>                                                                                                                                                                                                                                                                                                                                                                                                                                                                                                                                                                                                                                                                                                                                                                                                                                                                                                                                                                                                                                                                                                                                                                                                                                                                                                                                                                                                                                                                                                                                                                                                                                                                                                                                                                                                                                                                                                                                                                                                                                                                                                                                                                                                                                                                                                                                                                                                                                                                                                                                                                                                                                                                                                                                                                                                                                                                                                                                                                                                                                                                                                                                                                     |
| <p>dr. kristen lindsey allegedly shot an arrow into the back of an orange orange tabby s head . it s the only good good tomcat is one with an arrow through it s head ! vet vet of the year award .</p>                                                                                                                                                                                                                                                                                                                                                                                                                                                                                                                                                                                                                                                                                                                                                                                                                                                                                                                                                                                                                                                                                                                                                                                                                                                                                                                                                                                                                                                                                                                                                                                                                                                                                                                                                                                                                                                                                                                                                                                                                                                                                                                                                                                                                                                                                                                                                                                                                                                                                                                                                                                                                                                                                                                                                                                                                                                                                                                                                                                |
| <b>Pretrained</b>                                                                                                                                                                                                                                                                                                                                                                                                                                                                                                                                                                                                                                                                                                                                                                                                                                                                                                                                                                                                                                                                                                                                                                                                                                                                                                                                                                                                                                                                                                                                                                                                                                                                                                                                                                                                                                                                                                                                                                                                                                                                                                                                                                                                                                                                                                                                                                                                                                                                                                                                                                                                                                                                                                                                                                                                                                                                                                                                                                                                                                                                                                                                                                      |
| <p>lindsey lindsey , a texas veterinarian , shot an arrow into the back of an orange tabby s head . she posted a photo of herself smiling , as she dangled its limp body by the arrow s shaft . lindsey could face charges , the sheriff s department says .</p>                                                                                                                                                                                                                                                                                                                                                                                                                                                                                                                                                                                                                                                                                                                                                                                                                                                                                                                                                                                                                                                                                                                                                                                                                                                                                                                                                                                                                                                                                                                                                                                                                                                                                                                                                                                                                                                                                                                                                                                                                                                                                                                                                                                                                                                                                                                                                                                                                                                                                                                                                                                                                                                                                                                                                                                                                                                                                                                       |

Table 6: The pretrained model outputs a highly relevant summary but makes a mistake on the feline executioner’s name. The no pretrain model degenerates into irrelevant details and repeats itself.

|                                                                                                                                                                                                                                                                                                                                                                                                                                                                                                                                                                                                                                                                                                                                                                                                                                                                                                                                                                                                                                                                                                                                                                                                                                                                                                                                                                                                                                                                                                                                                                                                                                                                                                                                                                                                                                                                                                                                                                                                                                                                 |
|-----------------------------------------------------------------------------------------------------------------------------------------------------------------------------------------------------------------------------------------------------------------------------------------------------------------------------------------------------------------------------------------------------------------------------------------------------------------------------------------------------------------------------------------------------------------------------------------------------------------------------------------------------------------------------------------------------------------------------------------------------------------------------------------------------------------------------------------------------------------------------------------------------------------------------------------------------------------------------------------------------------------------------------------------------------------------------------------------------------------------------------------------------------------------------------------------------------------------------------------------------------------------------------------------------------------------------------------------------------------------------------------------------------------------------------------------------------------------------------------------------------------------------------------------------------------------------------------------------------------------------------------------------------------------------------------------------------------------------------------------------------------------------------------------------------------------------------------------------------------------------------------------------------------------------------------------------------------------------------------------------------------------------------------------------------------|
| <b>Source Document</b>                                                                                                                                                                                                                                                                                                                                                                                                                                                                                                                                                                                                                                                                                                                                                                                                                                                                                                                                                                                                                                                                                                                                                                                                                                                                                                                                                                                                                                                                                                                                                                                                                                                                                                                                                                                                                                                                                                                                                                                                                                          |
| eugenie bouchard s run of poor form continued as the top seed was beaten 6 - 3 , 6 - 1 by american lauren davis in the second round at the family circle cup in charleston on wednesday . davis , 21 , had lost her only career meeting with bouchard , but was in control this time against the world no 7 . davis won nine of the final 11 games of the match and broke bouchard s serve twice in the final set to pull off the upset . eugenie bouchard fires down a serve during her second - round match at the family circle cup bouchard shows her frustrations during her straight - sets defeat by lauren davis on wednesday i ve never beaten here before , so i came out knowing i had nothing to lose , said davis , ranked 66th in the world . bouchard was a semi-finalist last year but had struggled in the lead - up to the charlston green - clay event , losing three of her last five matches to lower - ranked opponents . davis used precise groundstrokes to keep bouchard on her heels throughout the second set . davis broke bouchard s serve to love to take a 3 - 1 lead as the 21 - year - old canadian had a double fault , then sailed a forehand long to fall behind . two games later , davis hit a backhand to send back bouchard s 102mph serve for a winner down the left sideline and a 5 - 1 lead . davis hits a forehand on her way to an impressive win against the canadian top seed bouchard has struggled recently , this time slumping to her fourth defeat in six matches the match ended on bouchard s forehand into the net , davis waving to the cheering crowd . bouchard said : as soon as it was over , definitely a bit of anger , but also kind of this confusion , slash , like quest to find what s wrong , like this kind of searching feeling that , ok , like i know something s off . i know something s not right . so i want to find it . i was definitely a little bit slow today , overpowered . usually , i m the one dominating . so it was definitely , just , i do nt know , just not good . |
| <b>Ground Truth summary</b>                                                                                                                                                                                                                                                                                                                                                                                                                                                                                                                                                                                                                                                                                                                                                                                                                                                                                                                                                                                                                                                                                                                                                                                                                                                                                                                                                                                                                                                                                                                                                                                                                                                                                                                                                                                                                                                                                                                                                                                                                                     |
| eugenie bouchard suffered her fourth defeat in six matches . the canadian top seed lost to lauren davis at the family circle cup . world no 66 davis won 6 - 3 , 6 - 1 in the second round in charleston . davis won nine of the final 11 games of the match to seal victory . <a href="#">click here for all the latest news from charleston</a> .                                                                                                                                                                                                                                                                                                                                                                                                                                                                                                                                                                                                                                                                                                                                                                                                                                                                                                                                                                                                                                                                                                                                                                                                                                                                                                                                                                                                                                                                                                                                                                                                                                                                                                             |
| <b>No pretrain</b>                                                                                                                                                                                                                                                                                                                                                                                                                                                                                                                                                                                                                                                                                                                                                                                                                                                                                                                                                                                                                                                                                                                                                                                                                                                                                                                                                                                                                                                                                                                                                                                                                                                                                                                                                                                                                                                                                                                                                                                                                                              |
| bouchard beat american lauren davis 6 - 3 , 6 - 1 in the second round of the family circle cup in charleston on wednesday . bouchard had lost her only career meeting with bouchard but was in control this time against the world no 7 . bouchard won nine of the final 11 games of the match and broke bouchard s serve twice in the final set to pull off the upset .                                                                                                                                                                                                                                                                                                                                                                                                                                                                                                                                                                                                                                                                                                                                                                                                                                                                                                                                                                                                                                                                                                                                                                                                                                                                                                                                                                                                                                                                                                                                                                                                                                                                                        |
| <b>Pretrained</b>                                                                                                                                                                                                                                                                                                                                                                                                                                                                                                                                                                                                                                                                                                                                                                                                                                                                                                                                                                                                                                                                                                                                                                                                                                                                                                                                                                                                                                                                                                                                                                                                                                                                                                                                                                                                                                                                                                                                                                                                                                               |
| eugenie bouchard was beaten 6 - 3 , 6 - 1 by american lauren davis in the second round . davis had lost her only career meeting with bouchard , but was in control this time against the world no 7 . davis hit a backhand to send back bouchard s 102mph serve for a winner down the left sideline .                                                                                                                                                                                                                                                                                                                                                                                                                                                                                                                                                                                                                                                                                                                                                                                                                                                                                                                                                                                                                                                                                                                                                                                                                                                                                                                                                                                                                                                                                                                                                                                                                                                                                                                                                           |

Table 7: Both models output a relevant summary, but the no pretrain model uses the same name to refer to both players.

|                                                                                                                                                                                                                                                                                                                                                                                                                                                                                                                                                                                                                                                                                                                                                                                                                                                                                                                                                                                                                                                                                                                                                                                                                                                                                                                                                                                                                                                                                                                                                                                                                                                                         |
|-------------------------------------------------------------------------------------------------------------------------------------------------------------------------------------------------------------------------------------------------------------------------------------------------------------------------------------------------------------------------------------------------------------------------------------------------------------------------------------------------------------------------------------------------------------------------------------------------------------------------------------------------------------------------------------------------------------------------------------------------------------------------------------------------------------------------------------------------------------------------------------------------------------------------------------------------------------------------------------------------------------------------------------------------------------------------------------------------------------------------------------------------------------------------------------------------------------------------------------------------------------------------------------------------------------------------------------------------------------------------------------------------------------------------------------------------------------------------------------------------------------------------------------------------------------------------------------------------------------------------------------------------------------------------|
| <b>Source Document</b>                                                                                                                                                                                                                                                                                                                                                                                                                                                                                                                                                                                                                                                                                                                                                                                                                                                                                                                                                                                                                                                                                                                                                                                                                                                                                                                                                                                                                                                                                                                                                                                                                                                  |
| ( cnn ) mike rowe is coming to a river near you . sometimes , you hear about a person who makes you feel good about humanity , but bad about yourself , rowe says . on thursday s episode of somebody s got ta do it , rowe meets up with chad pregracke , the founder of living lands & waters , who does just that . pregracke wants to clean up the nation s rivers one piece of detritus at a time . his quota ? always more . read mike rowe s facebook post on how to break our litter habit . since he founded the nonprofit in 1998 at the ripe age of 23 , pregracke and more than 87,000 volunteers have collected 8.4 million pounds of trash from u.s. waterways . those efforts helped him earn the 2013 cnn hero of the year award , along with numerous other honors . wherever you are , no matter if there s a stream , a creek , a lake , whatever , that needs to be cleaned up , you can do it . just organize it and do it , he told cnn s anderson cooper after his win . pregracke also gives rowe a tour of the 150 - foot , solar - powered barge that the living lands & waters staff calls home during lengthy cleanups . the part - home , part - office , part - dumpster has seven bedrooms , two bathrooms , a classroom and a kitchen – and just happens to be made from a recycled strip club . according to the organization s latest annual report , pregracke has made it his mission in 2015 to remove 500,000 more pounds of trash . if you d like to help achieve this goal , visit his website to learn how to help : <a href="http://livinglandsandwaters.org/get-involved/">livinglandsandwaters.org / get - involved /</a> . |
| <b>Ground Truth summary</b>                                                                                                                                                                                                                                                                                                                                                                                                                                                                                                                                                                                                                                                                                                                                                                                                                                                                                                                                                                                                                                                                                                                                                                                                                                                                                                                                                                                                                                                                                                                                                                                                                                             |
| chad pregracke was the 2013 cnn hero of the year . mike rowe visited pregracke for an episode of somebody s got ta do it .                                                                                                                                                                                                                                                                                                                                                                                                                                                                                                                                                                                                                                                                                                                                                                                                                                                                                                                                                                                                                                                                                                                                                                                                                                                                                                                                                                                                                                                                                                                                              |
| <b>No pretrain</b>                                                                                                                                                                                                                                                                                                                                                                                                                                                                                                                                                                                                                                                                                                                                                                                                                                                                                                                                                                                                                                                                                                                                                                                                                                                                                                                                                                                                                                                                                                                                                                                                                                                      |
| rowe meets up with chad pregracke , founder of living lands & waters . pregracke and more than 87,000 volunteers collected 8.4 million pounds of trash from u.s. waterways .                                                                                                                                                                                                                                                                                                                                                                                                                                                                                                                                                                                                                                                                                                                                                                                                                                                                                                                                                                                                                                                                                                                                                                                                                                                                                                                                                                                                                                                                                            |
| <b>Pretrained</b>                                                                                                                                                                                                                                                                                                                                                                                                                                                                                                                                                                                                                                                                                                                                                                                                                                                                                                                                                                                                                                                                                                                                                                                                                                                                                                                                                                                                                                                                                                                                                                                                                                                       |
| rowe is the founder of living lands & waters , who does just that . pregracke also gives rowe a tour of the 150 - foot barge that the living lands & waters gets .                                                                                                                                                                                                                                                                                                                                                                                                                                                                                                                                                                                                                                                                                                                                                                                                                                                                                                                                                                                                                                                                                                                                                                                                                                                                                                                                                                                                                                                                                                      |

Table 8: A failure case. The pretrained model outputs irrelevant details while the no pretrain model successfully summarizes the document.

|                                                                                                                                                                                                                                                                                                                                                                   |
|-------------------------------------------------------------------------------------------------------------------------------------------------------------------------------------------------------------------------------------------------------------------------------------------------------------------------------------------------------------------|
| <b>Source</b>                                                                                                                                                                                                                                                                                                                                                     |
| Mayor Bloomberg told reporters that, because of that court order, the city had suspended the reopening of the public space and protesters were informed, however, that local laws do not allow them to re-install with camping shops and sleeping bags.                                                                                                           |
| <b>Ground Truth</b>                                                                                                                                                                                                                                                                                                                                               |
| Bürgermeister Bloomberg stellt vor der Presse klar , das aufgrund dieser richterlichen Anordnung die erneute Öffnung des Platzes für den Publikumsverkehr und die Demonstranten aufgehoben worden sei . Die Demonstranten wies er darauf hin , dass die Stadtgesetze ihnen nicht erlaubten , sich erneut mit Zelten und Schlafsäcken an diesem Ort einzurichten . |
| <b>No pretrain</b>                                                                                                                                                                                                                                                                                                                                                |
| Der Bürgermeister Bloomberg sagte den Reportern , dass die Stadt aufgrund dieser Gerichtsentscheidung die Wiedereröffnung des öffentlichen Raumes und die Information der Demonstranten ausgesetzt habe , dass die lokalen Gesetze ihnen nicht erlauben , mit den Campingplätzen und Schlafsäcken neu zu installieren .                                           |
| <b>Pretrained</b>                                                                                                                                                                                                                                                                                                                                                 |
| Bürgermeister Bloomberg erklärte gegenüber Journalisten , dass die Stadt aufgrund dieser Gerichtsentscheidung die Wiedereröffnung des öffentlichen Raums ausgesetzt habe und dass die Demonstranten darüber informiert wurden , dass die örtlichen Gesetze es ihnen nicht erlauben würden , sich mit Campingplätzen und Schlafsäcken neu zu installieren .        |

Table 9: The no pretrain model makes a complete mistranslation when outputting "und die Information der Demonstranten ausgesetzt habe". That translates to "the reopening of the public space and the information [noun] of the protesters were suspended", instead of informing the protesters. Furthermore, it wrongly separated the two sentences, so the first sentence has extra words and the second sentence is left without a subject. The pretrained model does not make any of these mistakes. However, both models make a vocabulary mistake of "zu installieren", which is typically only used to refer to installing software. A human evaluator fluent in both German and English said that the pretrained version was better.

|                                                                                                                                                                                                                                                                                                                                                                                                                                                                                           |
|-------------------------------------------------------------------------------------------------------------------------------------------------------------------------------------------------------------------------------------------------------------------------------------------------------------------------------------------------------------------------------------------------------------------------------------------------------------------------------------------|
| <b>Source</b>                                                                                                                                                                                                                                                                                                                                                                                                                                                                             |
| The low February temperatures, not only did they cause losses of millions for the agricultural sector, but they limited the possibilities of the state economy to grow, causing a contraction of the economic activity in general of 3.6 percent in the first half of the year, mainly supported by the historic fall of 31.16 per cent in agriculture, which affected the dynamics of other economic sectors.                                                                            |
| <b>Ground Truth</b>                                                                                                                                                                                                                                                                                                                                                                                                                                                                       |
| Die niedrigen Temperaturen im Februar verursachten nicht nur Verluste in Millionenhöhe in der Landwirtschaft , sondern steckten darüber hinaus dem Wachstum der Staatswirtschaft enge Grenzen und verursachten im ersten Vierteljahr einen allgemeinen Rückgang der Wirtschaftstätigkeit um 3,6 Prozent Dieser geht hauptsächlich auf den historischen Abbau der landwirtschaftlichen Entwicklung um 31,16 Prozent zurück , der sich bremsend auf weitere Wirtschaftssektoren auswirkte . |
| <b>No pretrain</b>                                                                                                                                                                                                                                                                                                                                                                                                                                                                        |
| Die niedrigen Temperaturen im Februar führten nicht nur zu Verlusten für die Landwirtschaft , sondern sie beschränkten die Möglichkeiten der staatlichen Wirtschaft , wachsen zu wachsen , wodurch die Wirtschaftstätigkeit insgesamt von 3,6 Prozent in der ersten Hälfte des Jahres , hauptsächlich durch den historischen Rückgang von 31.16 % in der Landwirtschaft , beeinflusst wurde , was die Dynamik anderer Wirtschaftssektoren betraf .                                        |
| <b>Pretrained</b>                                                                                                                                                                                                                                                                                                                                                                                                                                                                         |
| Die niedrigen Temperaturen im Februar führten nicht nur zu Verlusten von Millionen für den Agrarsektor , sondern beschränkten die Möglichkeiten der Staatswirtschaft , zu wachsen , was zu einer Schrumpfung der Wirtschaftstätigkeit im Allgemeinen von 3,6 Prozent in der ersten Hälfte des Jahres führte , hauptsächlich durch den historischen Einbruch von 316 Prozent in der Landwirtschaft , der die Dynamik anderer Wirtschaftsbereiche beeinflusst hatte .                       |

Table 10: The human evaluator noted that the pretrained version is better, as it correctly captures the meaning and sentence structure of the middle. The no pretrain model does not miss translating the word "million", repeats itself in "wachsen zu wachsen", and puts the verb "beeinflusst wurde" in an unnatural position. However, the pretrained model makes a mistake in the percentage (316% instead of 31.16%).

|                                                                                                                                                                                                                                                                                                                                                                                                                                                                                                                                                                                                                                                             |
|-------------------------------------------------------------------------------------------------------------------------------------------------------------------------------------------------------------------------------------------------------------------------------------------------------------------------------------------------------------------------------------------------------------------------------------------------------------------------------------------------------------------------------------------------------------------------------------------------------------------------------------------------------------|
| <b>Source</b>                                                                                                                                                                                                                                                                                                                                                                                                                                                                                                                                                                                                                                               |
| To facilitate the inception of the Second World War, they allowed bankers and politicians to create a latent conflict situation by saddling Germany with huge war reparations, thereby making a radicalist example of the impoverished masses, it remained only to introduce a sufficiently convincing culprit and a leader with a simple solution, while also creating a multi-racial Czechoslovakia with a strong German minority to play, and indeed did, the role of a fifth colony, once the war had been ignited.                                                                                                                                     |
| <b>Ground Truth</b>                                                                                                                                                                                                                                                                                                                                                                                                                                                                                                                                                                                                                                         |
| Um den Zweiten Weltkrieg einfacher entfachen zu können , ließen die Banker durch die Politik eine latente Konfliktsituation schaffen , indem sie Deutschland mit gigantischen Kriegsreparationen belegten ; dadurch schufen sie die Voraussetzung verarmter Massen , so dass sie den Deutschen nur noch einen ausreichend starken Führer unterjubeln mussten , der die Schuldigen benannte und einfache Lösungen anbot ; ein weiterer Faktor war die Schaffung des Vielvölkerstaates Tschechoslowakei mit einer starken deutschen Minderheit , die die Funktion einer fünften Kolonne einnehmen sollte und auch einnahm , um den Kriegsbrand zu entfachen . |
| <b>No pretrain</b>                                                                                                                                                                                                                                                                                                                                                                                                                                                                                                                                                                                                                                          |
| Um die Gründung des Zweiten Weltkriegs zu erleichtern , ermöglichte es den Bankern und Politikern , eine latente Konfliktslage zu schaffen , indem sie Deutschland mit enormen Reparationsforderungen konfrontierte , wodurch ein radikalislamistisches Beispiel der verarmten Massen entstand , es blieb nur , einen ausreichend aussagekräftigen Schuldigen und einen Führer mit einer einfachen Lösung zu etablieren , während gleichzeitig eine multi-ethnische Tschechoslowakei mit einer starken deutschen Minderheit zu spielen war und tatsächlich die Rolle einer fünften Kolonie war .                                                            |
| <b>Pretrained</b>                                                                                                                                                                                                                                                                                                                                                                                                                                                                                                                                                                                                                                           |
| Um die Einführung des Zweiten Weltkrieges zu erleichtern , ließen sie Banker und Politiker eine latente Konfliktslage schaffen , indem sie Deutschland mit riesigen Reparationszahlungen belieferten , wodurch ein radikalislamistisches Beispiel der verarmten Massen entstand , es blieb nur , einen ausreichend überzeugenden Schuldigen und einen Führer mit einer einfachen Lösung zu präsentieren , während gleichzeitig eine multiethnische Tschechoslowakei mit einer starken deutschen Minderheit geschaffen wurde , um zu spielen , und tatsächlich , die Rolle einer fünften Kolonie , sobald der Krieg entfacht worden war .                    |

Table 11: An example where the English source is poorly worded. Both models output poor translations, but the evaluator noted that the pretrained version is still better than the no pretrain version. Interestingly, both models mistranslate "radical" as "radikalislamistisches", which means "radical Islam", which is probably a bias in the training data.

|                                                                                                                                                                                                                                                                                                                                                                                                                                                                                                                          |
|--------------------------------------------------------------------------------------------------------------------------------------------------------------------------------------------------------------------------------------------------------------------------------------------------------------------------------------------------------------------------------------------------------------------------------------------------------------------------------------------------------------------------|
| <b>Source</b>                                                                                                                                                                                                                                                                                                                                                                                                                                                                                                            |
| The total vote count will also be done if at the end of the ordinary calculation is established that the difference between the winner and the candidate placed on second position is equal to or less than one percentage point, as long as there is a request of the representative of the political party whose candidate came on the second position, case in which there will be excluded the electoral boxes that have been considered during the partial recount.                                                 |
| <b>Ground Truth</b>                                                                                                                                                                                                                                                                                                                                                                                                                                                                                                      |
| Die Stimmenaushöhlung kann auch in ihrer Gesamtheit erfolgen , wenn nach Abschluss der ordentlichen Berechnung festgestellt wird , dass der Unterschied zwischen dem mutmaßlichen Gewinner und dem Kandidaten auf dem zweiten Platz gleich oder geringer als ein Prozent ist , vorausgesetzt es liegt ein ausdrücklicher Antrag von einem Vertreter der Partei , deren Kandidat Zweiter geworden ist , vor . In diesem Fall würden die Wahlpakete , die einer teilweisen Auszählung ausgesetzt wurden , ausgeschlossen . |
| <b>No pretrain</b>                                                                                                                                                                                                                                                                                                                                                                                                                                                                                                       |
| Die gesamte Stimmenanzahl wird auch dann erreicht , wenn am Ende der ordentlichen Berechnung festgestellt wird , dass der Unterschied zwischen dem Sieger und dem Kandidaten , der auf der zweiten Position liegt , gleich oder weniger als einen Prozentpunkt beträgt , vorausgesetzt , dass der Vertreter der Partei , deren Kandidat auf der zweiten Position ist , der Fall ist , in dem die Wahlunterlagen , die während der teilweisen Rückzählung berücksichtigt wurden , ausgeschlossen werden .                 |
| <b>Pretrained</b>                                                                                                                                                                                                                                                                                                                                                                                                                                                                                                        |
| Die Gesamtzahl der Stimmzettel wird auch dann durchgeführt , wenn am Ende der ordentlichen Berechnung festgestellt wird , dass der Unterschied zwischen dem Gewinner und dem auf den zweiten Platz platzierten Kandidaten gleich oder weniger als einen Prozentpunkt beträgt , solange es einen Antrag des Vertreters der politischen Partei gibt , dessen Kandidat auf die zweite Position kam , in dem es die Wahlzettel ausklammert , die während der Teilzählung berücksichtigt wurden .                             |

Table 12: Another example where the English source is poorly worded. Both models get the structure right, but have a variety of problematic translations. Both models miss the meaning of "total vote count". They both also translate "electoral boxes" poorly - the no pretrain model calls it "electoral paperwork" while the pretrained model calls it "ballots". These failures may be because of the poorly worded English source. The human evaluator found them both equally poor.
